# Supplementary material for: FBXO28 promotes cell proliferation, migration and invasion via upregulation of the TGF-beta1/SMAD2/3 signaling pathway in ovarian cancer
Source: Springer Nature journal article supplement (doi:10.1186/s12885-024-11893-8), 2024-01-24
Supplement: MOESM5 [file 26658204]

Figure 1E

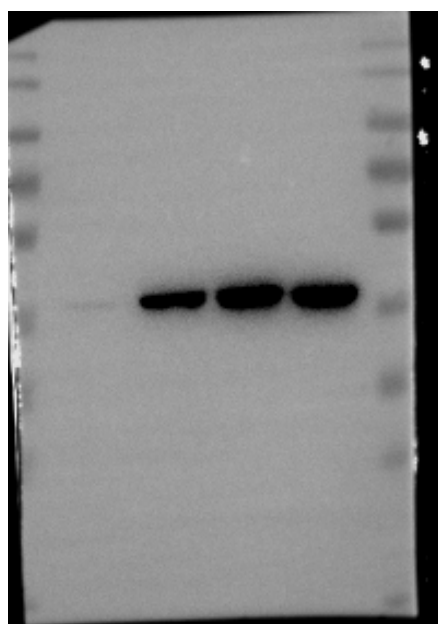

FBXO28

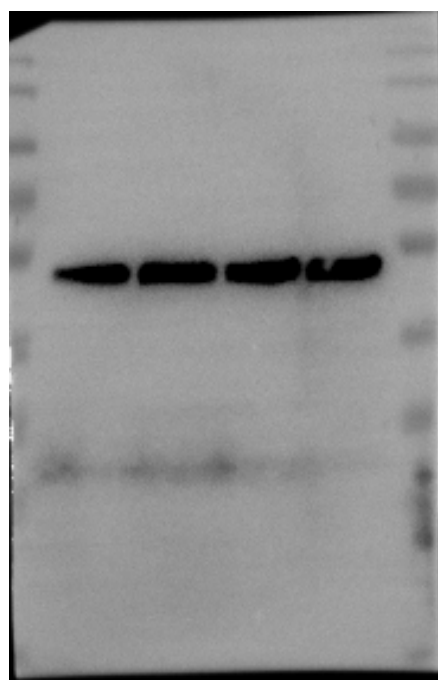

Tubulin

Figure 2A

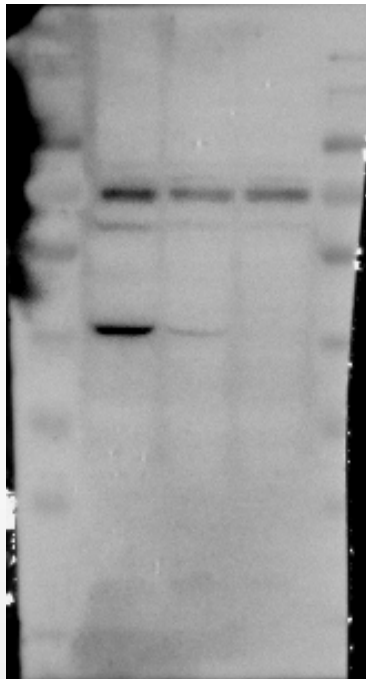

FBXO28

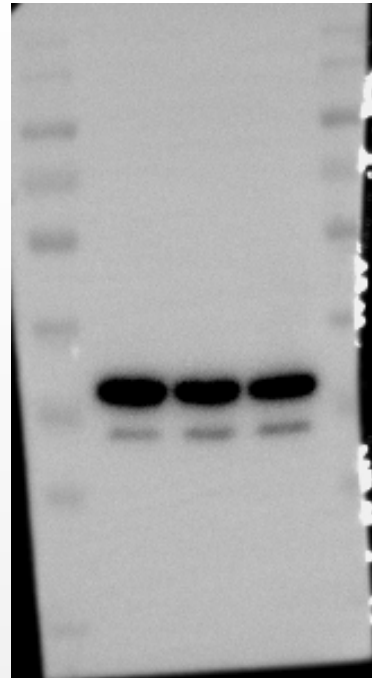

GAPDH

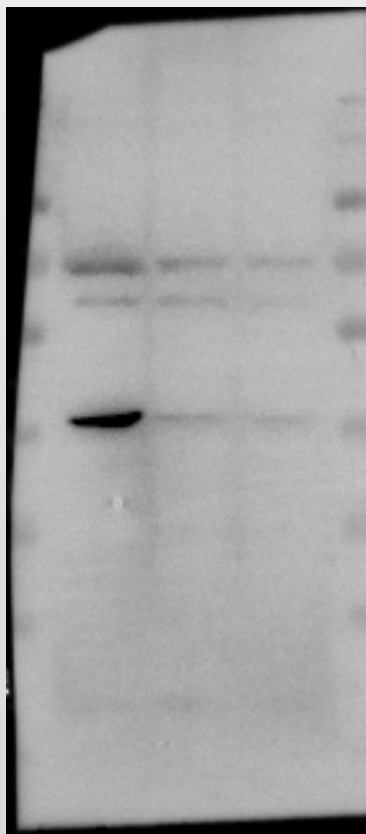

FBXO28

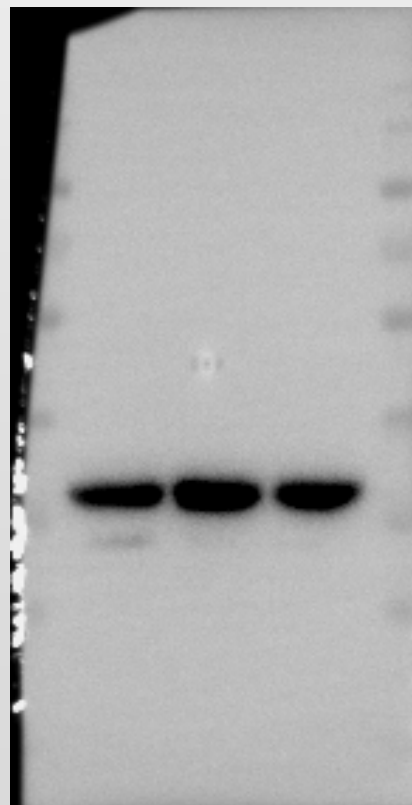

GAPDH

Figure 2B

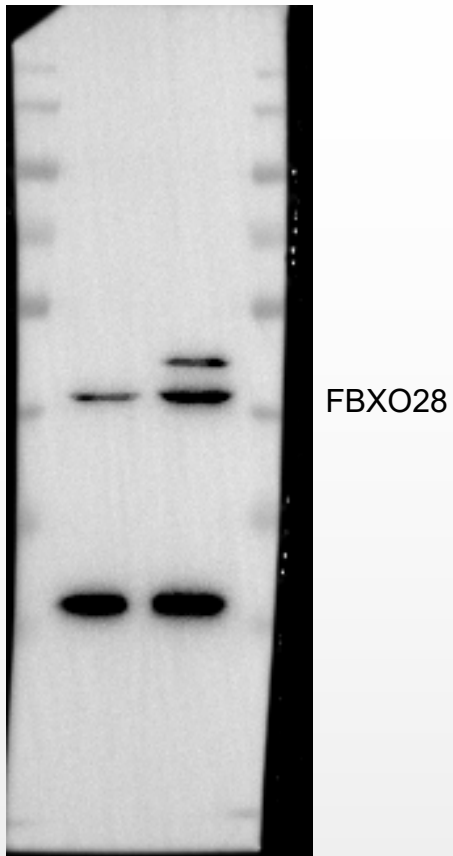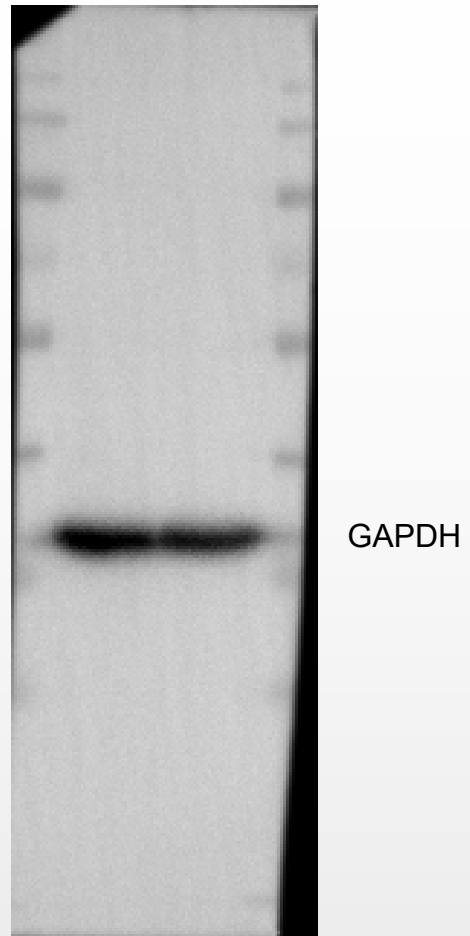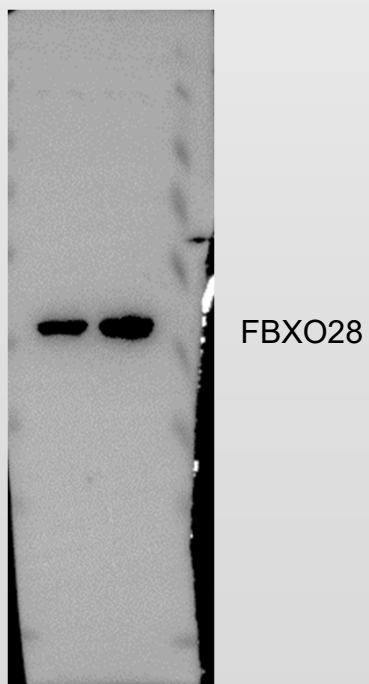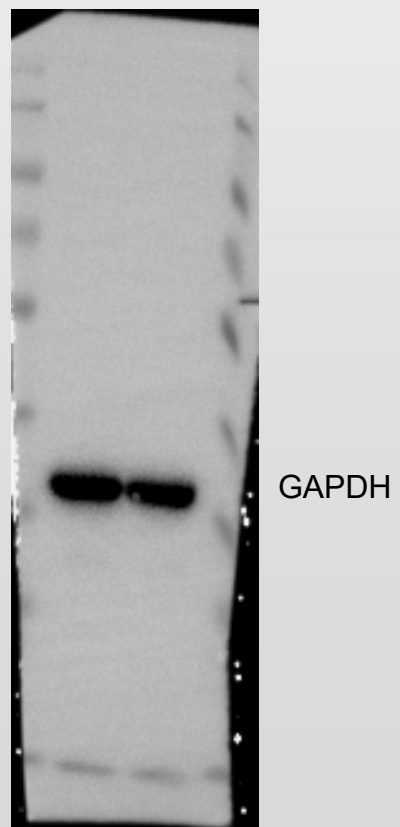

Figure 4B

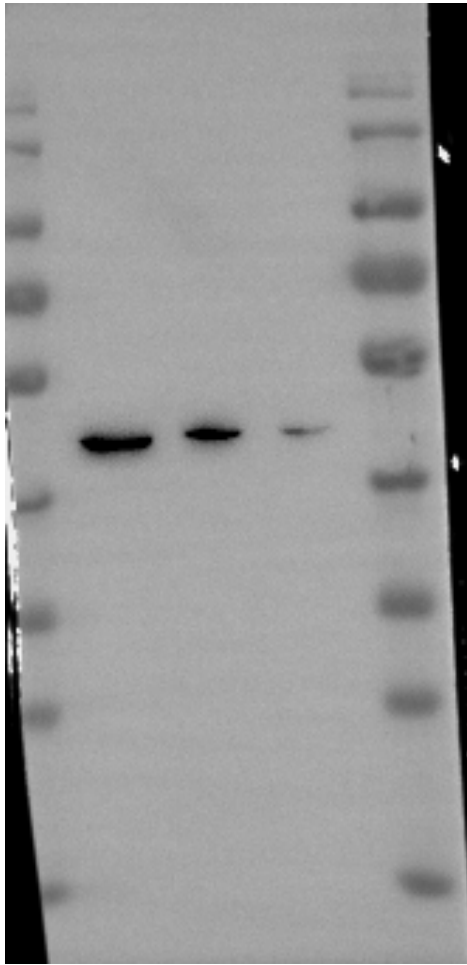

TGF-β1

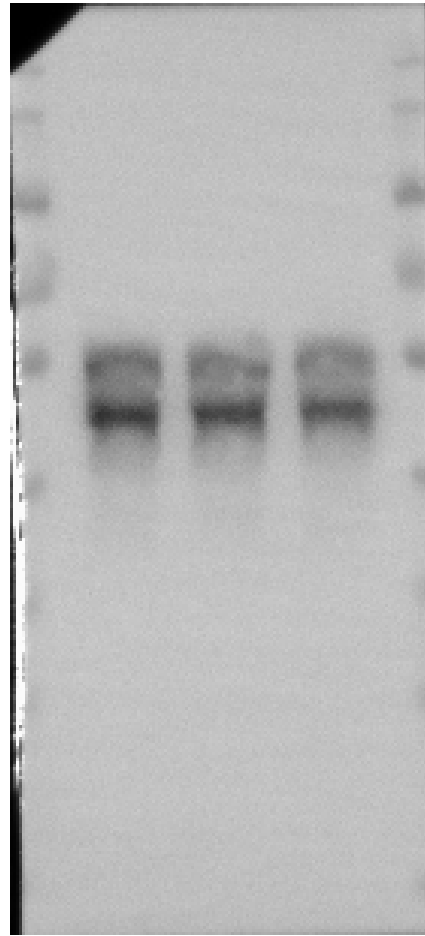

SMAD2/3

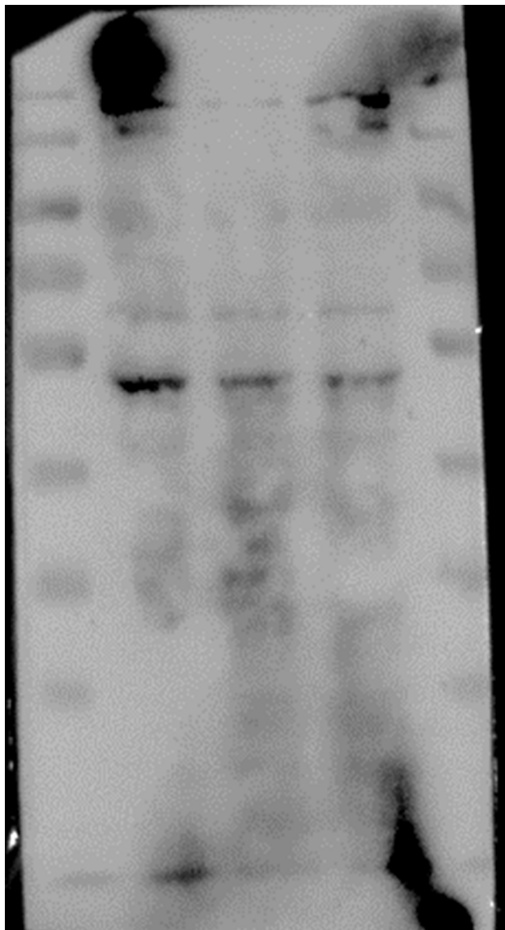

P-SMAD2/3

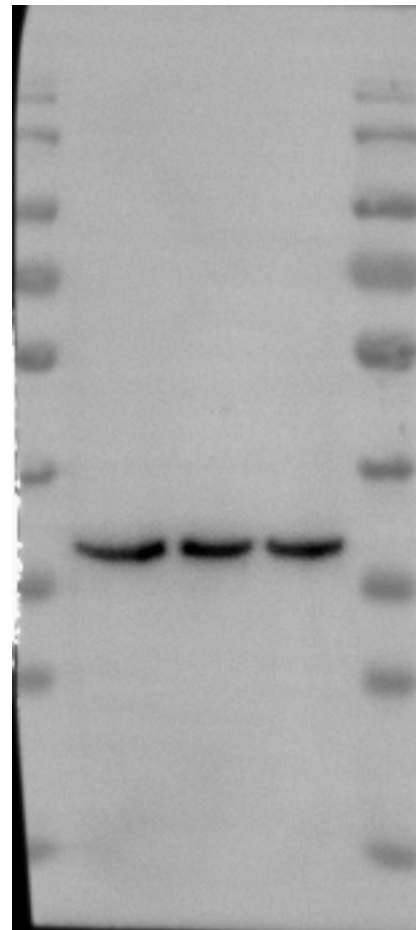

GAPDH

Figure 4C

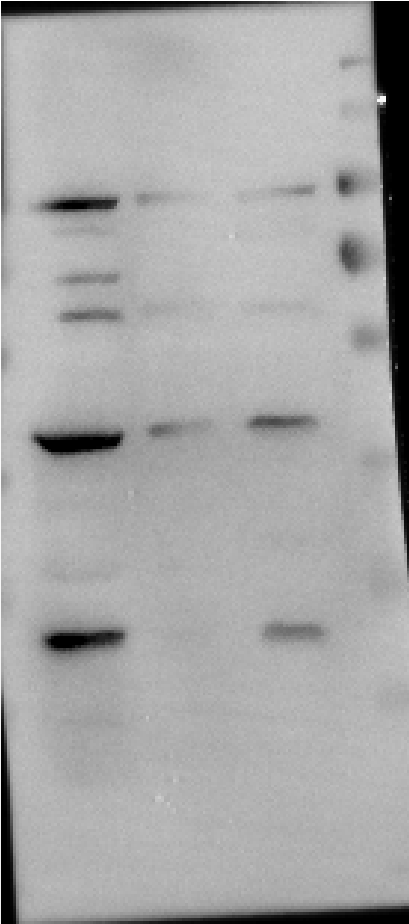

TGF-β1

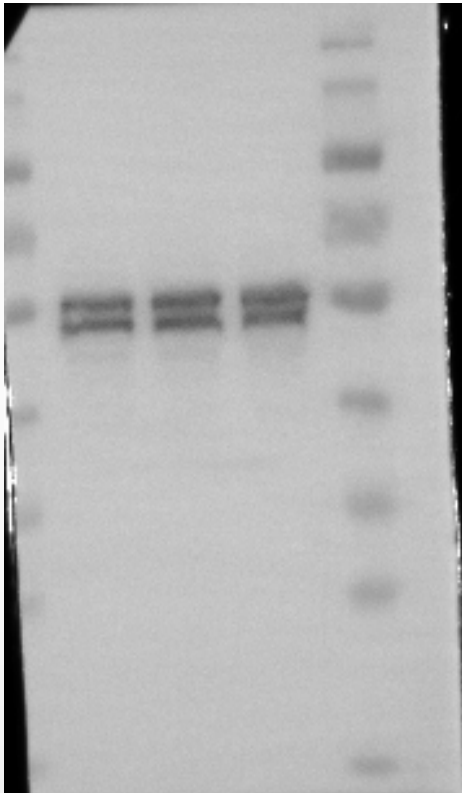

SMAD2/3

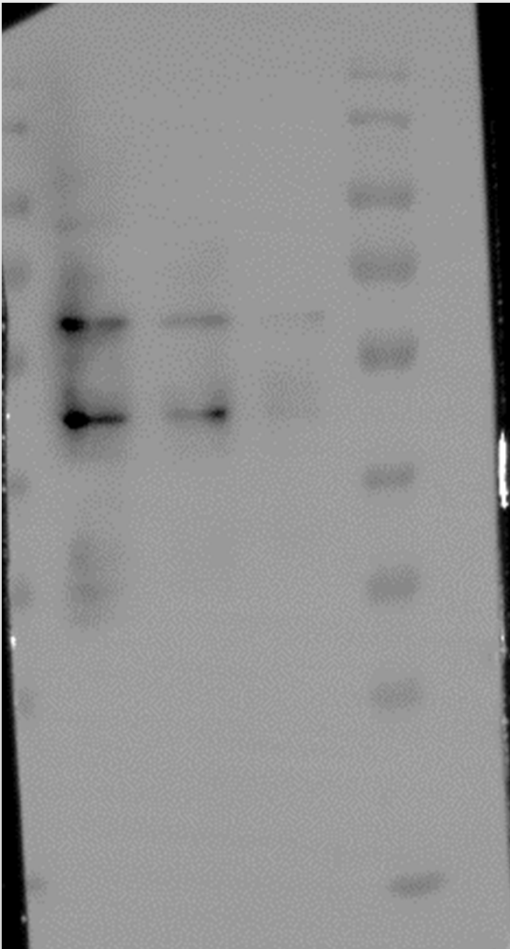

P-SMAD2/3

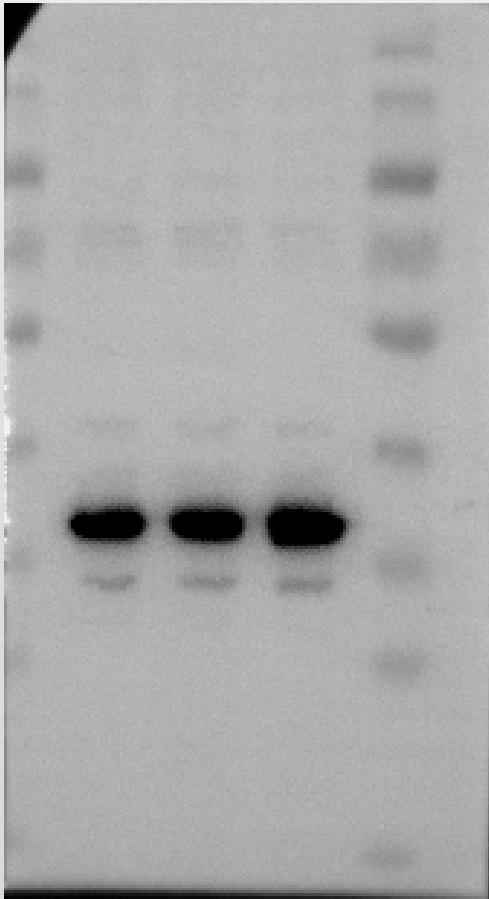

GAPDH

Figure 4E left

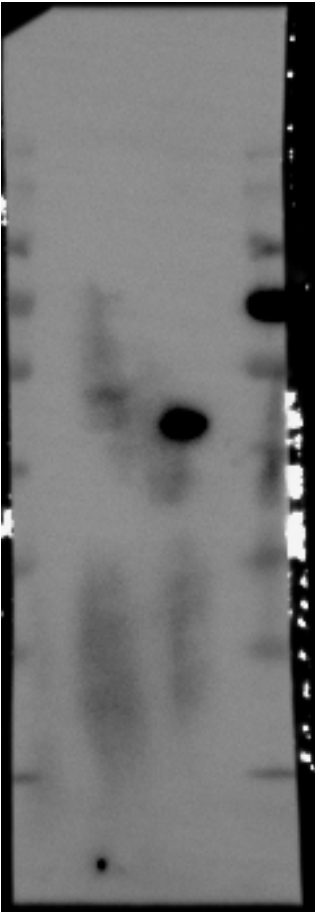

TGF-β1

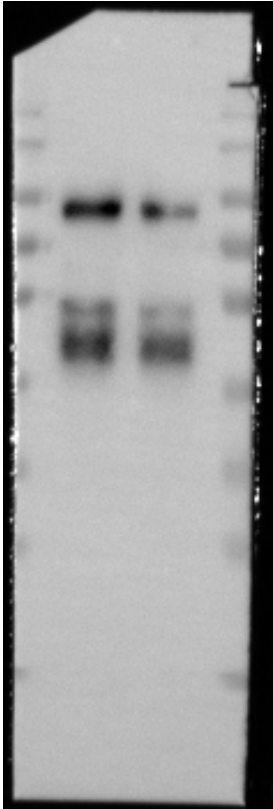

SMAD2/3

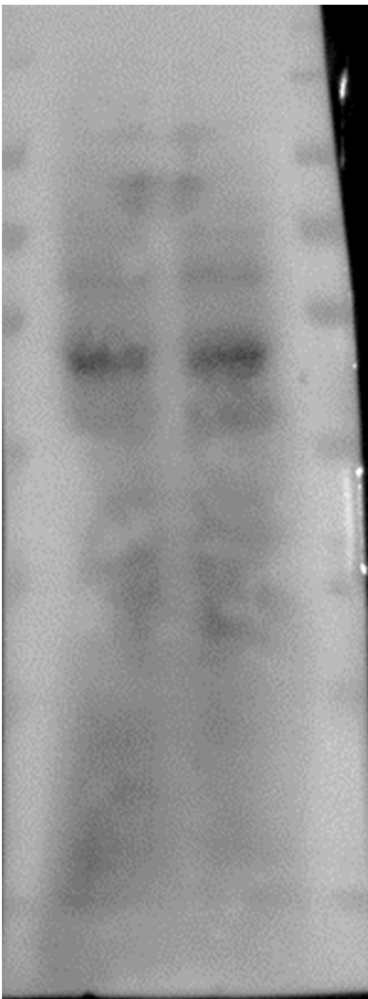

P-SMAD2/3

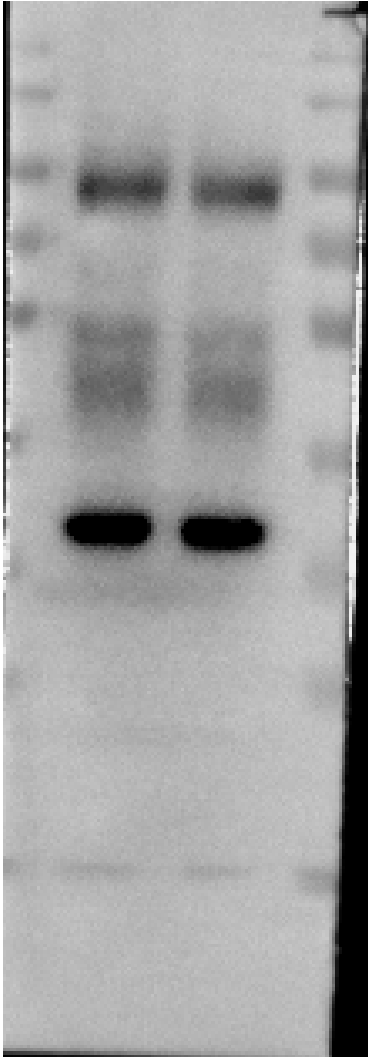

GAPDH

Figure 4E right

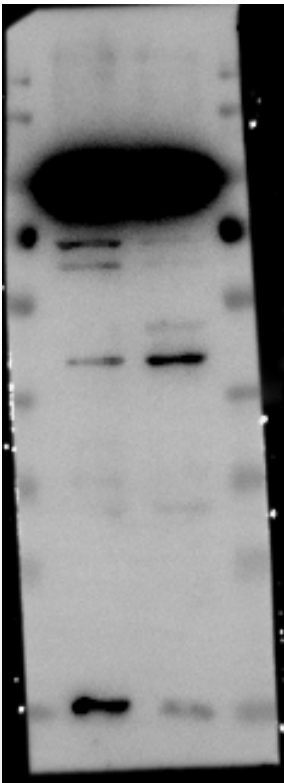

TGF-β1

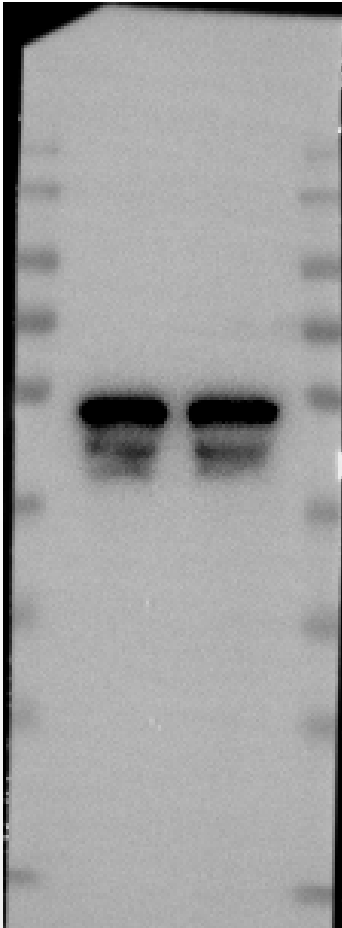

SMAD2/3

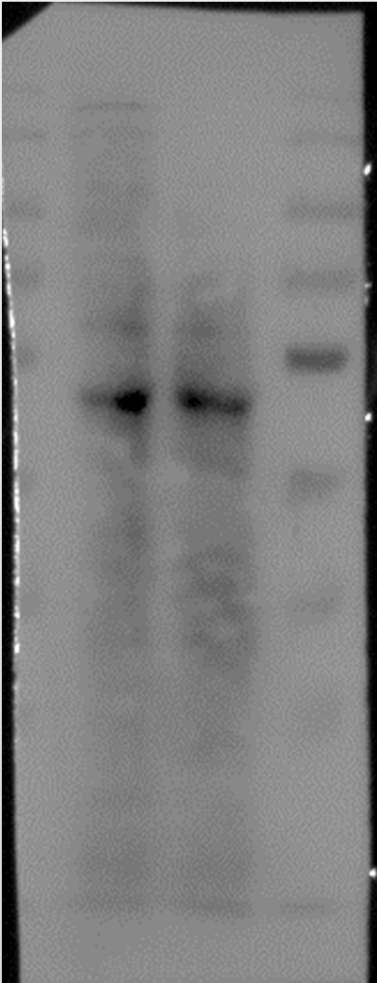

P-SMAD2/3

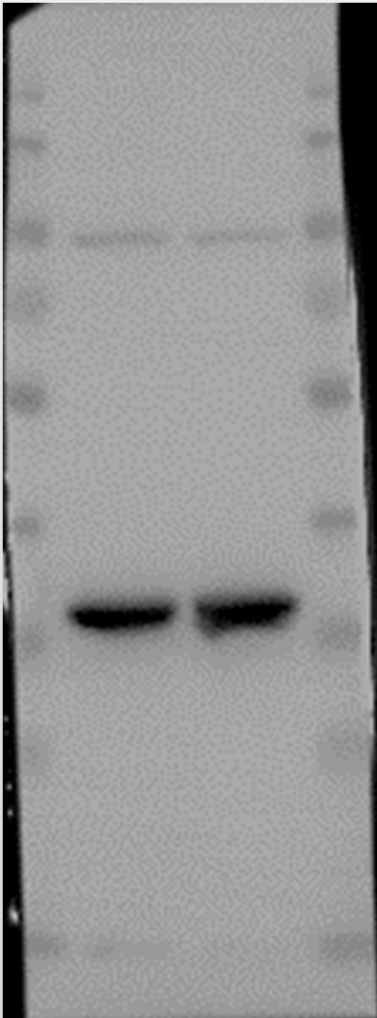

GAPDH

Figure 4B

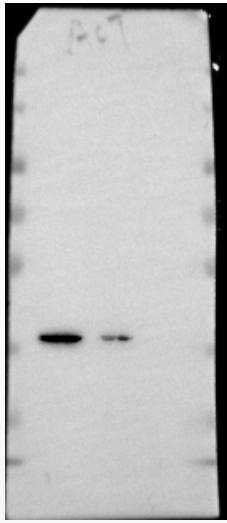

FBXO28

Figure 4C

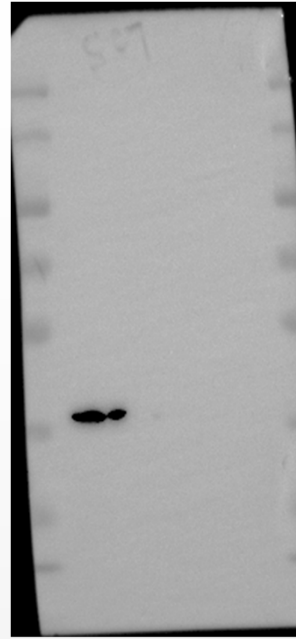

FBXO28

Figure 4E

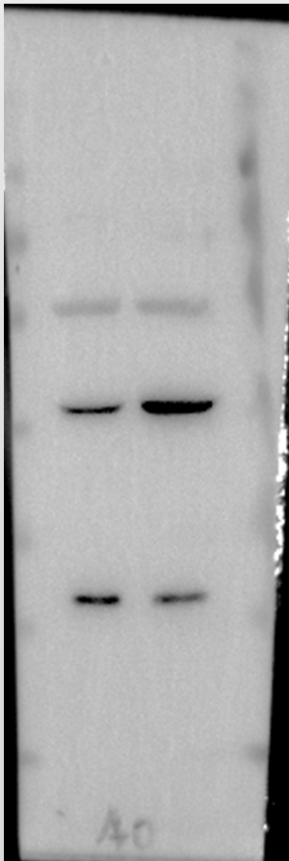

FBXO28

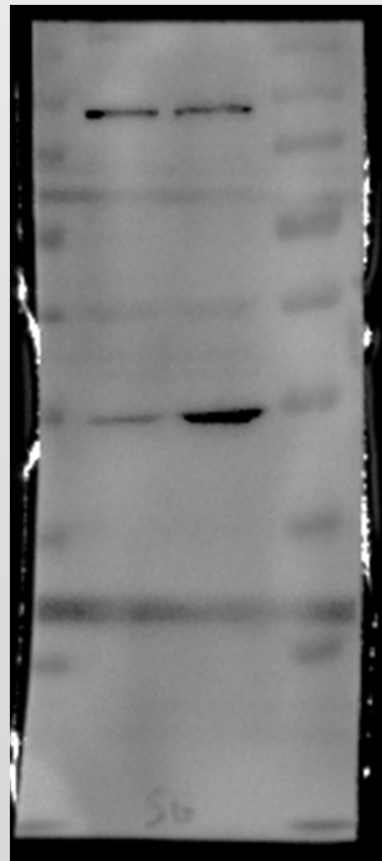

FBXO28



Figure 5A

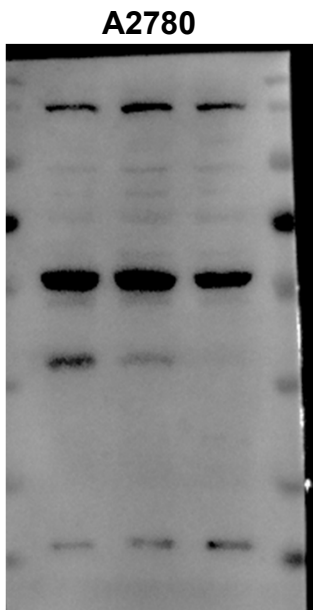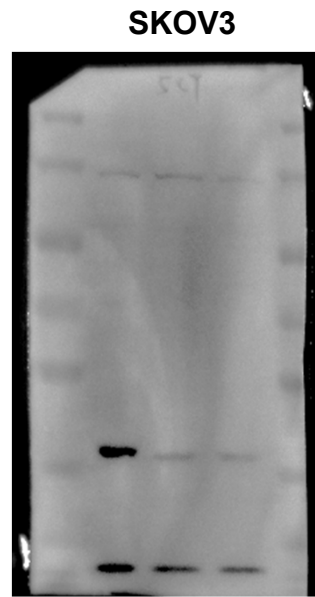

FBXO28

FBXO28

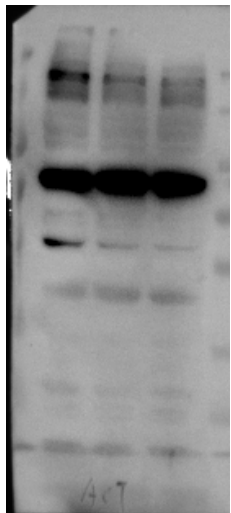

N-cadherin

**A2780**

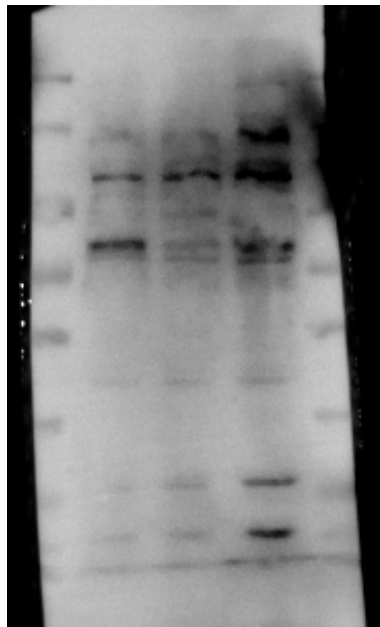

E-cadherin

**A2780**

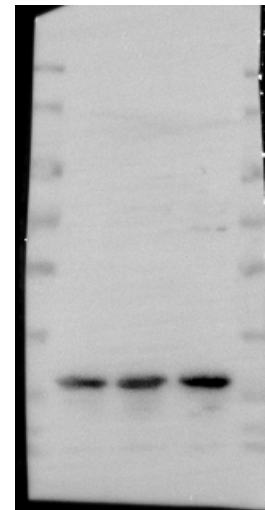

GAPDH

**A2780**

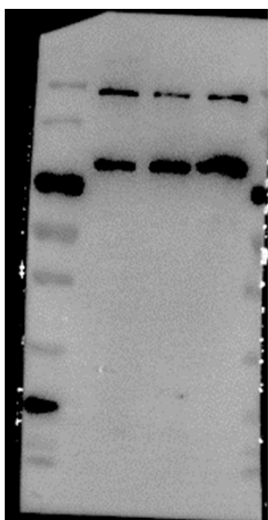

N-cadherin

**SKOV3**

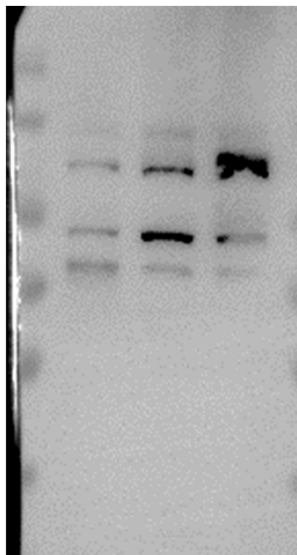

E-cadherin

**SKOV3**

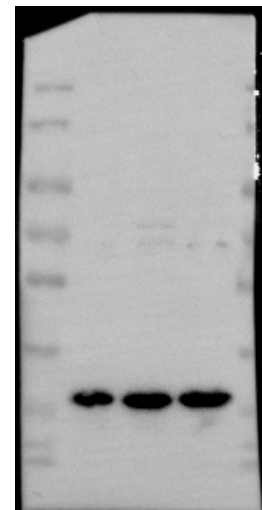

GAPDH

**SKOV3**

Figure 5C

A2780

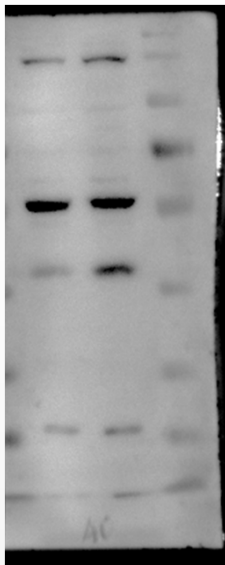

FBXO28

SKOV3

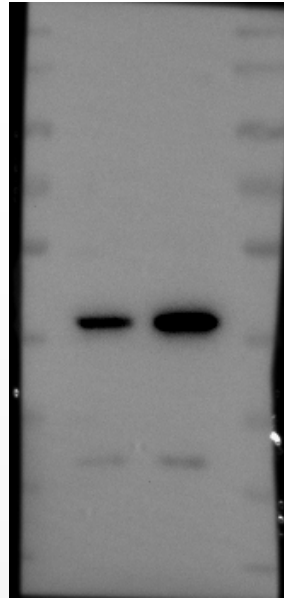

FBXO28

A2780

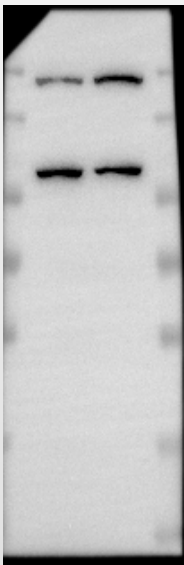

N-cadherin

E-cadherin

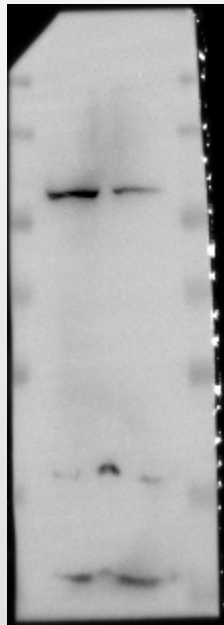

GAPDH

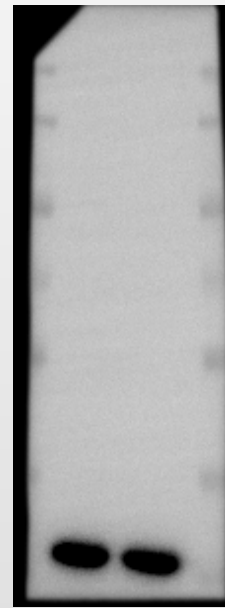

SKOV3

N-cadherin

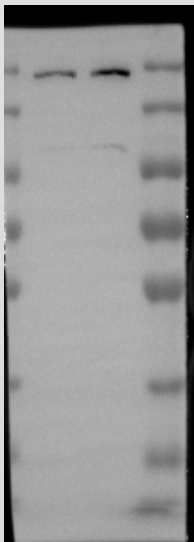

E-cadherin

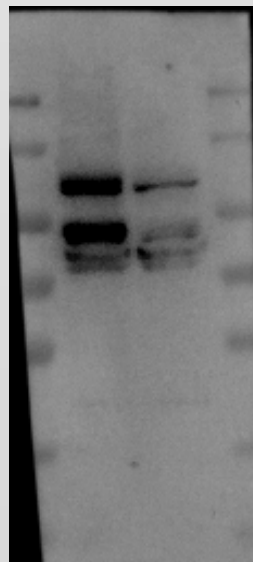

GAPDH

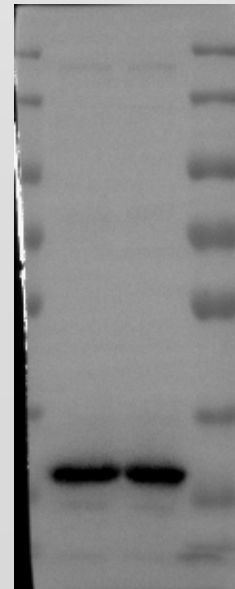

Figure 6A

A2780

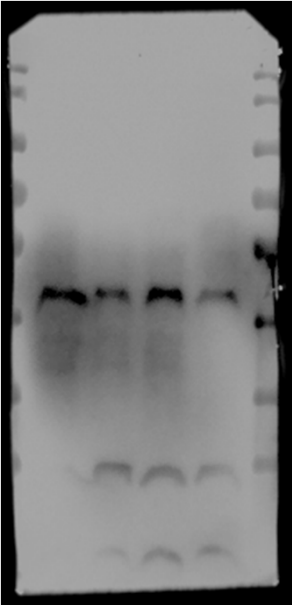

FBXO28

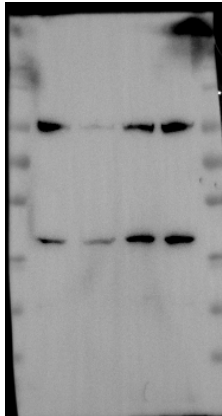

TGF-β1

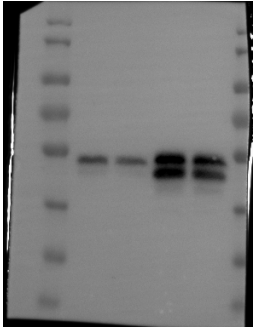

SMAD2/3

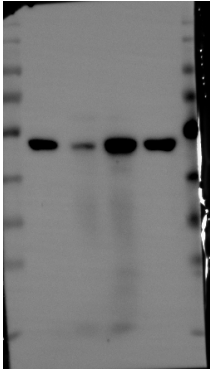

p-SMAD2/3

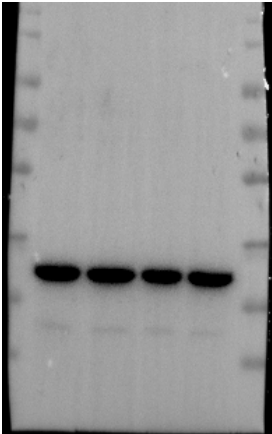

GAPDH

SKOV3

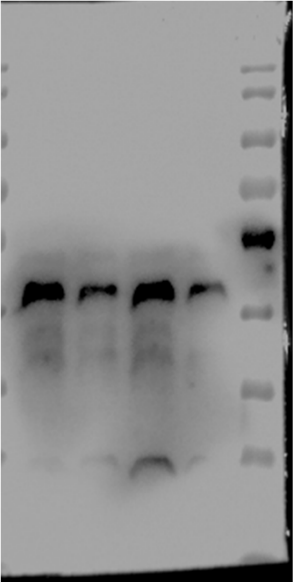

FBXO28

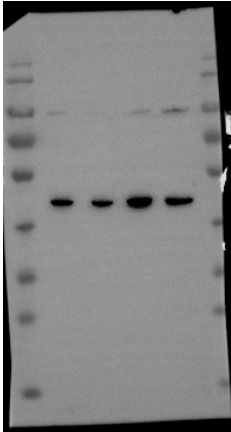

TGF-β1

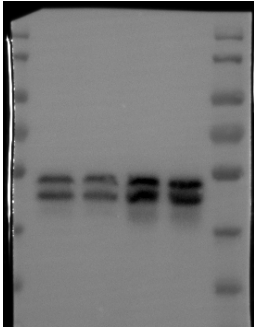

SMAD2/3

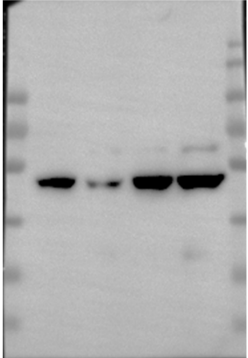

p-SMAD2/3

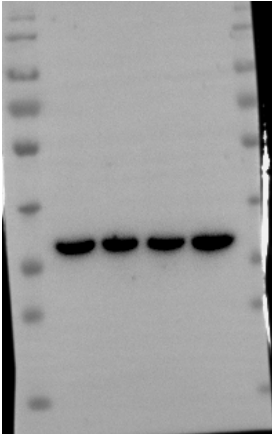

GAPDH
